# Supplementary material
Source: publisher figshare collection journal article supplement (https://gsapubs.figshare.com/articles/dataset/_/19285499)

Figure S1

Wu, C., Li, J., Zuza, A.V., Haproff, P.J., Yin, A., and Ding, L., 2022, Paleoproterozoic–Paleozoic tectonic evolution of the Longshou Shan, western North China craton: *Geosphere*, v. 18, <https://doi.org/10.1130/GES02491.1>

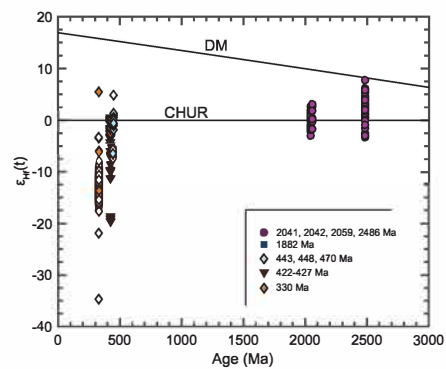

Supplement: Supplementary file 1 [file 1]
